# Supplementary material for: Sex‐Based Differences in Unrecognized Myocardial Infarction
Source: PubMed Central journal article supplement — J Am Heart Assoc. 2020 Jun 23;9(13):e015519. doi: 10.1161/JAHA.119.015519 (PMC7670510; doi:10.1161/jaha.119.015519), 2020-06-23

# **SUPPLEMENTAL MATERIAL**

**Table S1. Incidence rate of recognized and unrecognized MI in the total Lifelines population, in men and women and in different age categories.**

|                         | MEN           |              |                                               | WOMEN         |              |                                               |
|-------------------------|---------------|--------------|-----------------------------------------------|---------------|--------------|-----------------------------------------------|
|                         | Persons years | No. of cases | Incidence rate per 1000 person years (95% CI) | Persons years | No. of cases | Incidence rate per 1000 person years (95% CI) |
| <b>RECOGNIZED MI</b>    |               |              |                                               |               |              |                                               |
| <i>All participants</i> | 154,309       | 305          | 1.98 [1.76, 2.21]*                            | 221,295       | 139          | 0.63 [0.53,0.74]*                             |
| <i>Age (years)</i>      |               |              |                                               |               |              |                                               |
| 18-29                   | 16,361        | 1            | 0.06 [<0.001, 0.34]                           | 27,010        | 1            | 0.04 [<0.001, 0.21]                           |
| 30-39                   | 31,845        | 6            | 0.19 [0.07,0.41]                              | 44,788        | 6            | 0.13 [0.05,0.29]                              |
| 40-49                   | 55,054        | 85           | 1.54 [1.23,1.91]                              | 80,162        | 27           | 0.34 [0.22,0.49]                              |
| 50-59                   | 27,488        | 68           | 2.47 [1.92,3.14]                              | 40,135        | 31           | 0.77 [0.52,1.10]                              |
| 60-69                   | 18,544        | 96           | 5.18 [4.19,6.32]                              | 23,256        | 46           | 1.98 [1.45,2.64]                              |
| 70-79                   | 4,643         | 45           | 9.69 [7.07,12.97]                             | 5,546         | 23           | 4.15 [2.63,6.22]                              |
| 80+                     | 375           | 4            | 10.67 [2.87,27.31]                            | 398           | 5            | 12.56 [4.05,29.32]                            |
| <b>UNRECOGNIZED MI</b>  |               |              |                                               |               |              |                                               |
| <i>All participants</i> | 153,324       | 60           | 0.39 [0.30 – 0.50]*                           | 220,979       | 59           | 0.27 [0.20 – 0.34]*                           |
| <i>Age (years)</i>      |               |              |                                               |               |              |                                               |
| 18-29                   | 16,360        | 1            | 0.06 [<0.001,0.34]                            | 27,007        | 0            | -                                             |
| 30-39                   | 31,845        | 6            | 0.18 [0.07,0.41]                              | 44,773        | 4            | 0.009 [0.002,0.02]                            |
| 40-49                   | 54,740        | 17           | 0.31 [0.18,0.50]                              | 80,131        | 20           | 0.25 [0.15,0.39]                              |
| 50-59                   | 27,243        | 8            | 0.29 [0.13,0.58]                              | 40,069        | 13           | 0.32 [0.17,0.55]                              |
| 60-69                   | 18,255        | 17           | 0.93 [0.54,1.49]                              | 23,146        | 16           | 0.69 [0.39,1.12]                              |
| 70-79                   | 4,508         | 9            | 2.00 [0.91,3.79]                              | 5,470         | 5            | 0.91 [0.29,2.13]                              |
| 80+                     | 372           | 2            | 5.38 [0.60,19.41]                             | 384           | 1            | 2.60 [0.03,14.49]                             |

MI = myocardial infarction, \*Incidence rate in de Lifelines population. Standardized incidence rates for the general Dutch population are 2.67 [1.86, 3.95] per 1000 person years in men and 1.69 [0.84, 3.19] in women for recognized myocardial infarction and 0.63 [0.24, 1.52] per 1000 person years in men and 0.23 [0.14, 1.45] in women for unrecognized myocardial infarction.

**Table S2. Baseline characteristics of individuals with unrecognized myocardial infarction and recognized myocardial infarction.**

|                                                                                                  | WOMEN                     |                          | P-value | MEN                       |                          | P-value | Sex Interaction P-value |
|--------------------------------------------------------------------------------------------------|---------------------------|--------------------------|---------|---------------------------|--------------------------|---------|-------------------------|
|                                                                                                  | Unrecognized MI<br>N = 59 | Recognized MI<br>N = 139 |         | Unrecognized MI<br>N = 60 | Recognized MI<br>N = 305 |         |                         |
| Age (mean +/- SD)                                                                                | 54.6 (11.1)               | 59.2 (11.9)              | 0.012   | 56.4 (13.3)               | 57.7 (11.0)              | 0.39    | 0.21                    |
| <b>Anthropometry (mean +/- SD)</b>                                                               |                           |                          |         |                           |                          |         |                         |
| BMI (kg/m <sup>2</sup> )                                                                         | 27.1 (4.4)                | 27.2 (4.5)               | 0.92    | 27.1 (4.3)                | 27.5 (3.4)               | 0.70    | 0.82                    |
| Heart rate (BPM)                                                                                 | 69 (11)                   | 70 (3)                   | 0.33    | 66 (13)                   | 67 (12)                  | 0.46    | 0.81                    |
| <b>Risk factor % (n)</b>                                                                         |                           |                          |         |                           |                          |         |                         |
| Hypertension                                                                                     | 39.0 (23)                 | 56.1 (78)                | 0.027   | 65.0 (39)                 | 62.0 (189)               | 0.66    | 0.06                    |
| Hypercholesterolemia                                                                             | 20.3 (12)                 | 48.9 (68)                | <0.001  | 28.3 (17)                 | 37.7 (115)               | 0.17    | 0.06                    |
| Diabetes Mellitus                                                                                | 6.8 (4)                   | 9.4 (13)                 | 0.55    | 10.0 (6)                  | 9.5 (29)                 | 0.91    | 0.59                    |
| Active or former smoker                                                                          | 64.4 (38)                 | 60.4 (84)                | 0.56    | 73.3 (44)                 | 75.1 (229)               | 0.78    | 0.57                    |
| Family Health – CVD                                                                              | 8.5 (5)                   | 13.0 (18)                | 0.37    | 6.7 (4)                   | 12.1 (37)                | 0.22    | 0.81                    |
| <b>Framingham risk – 10 year risk (median – 25<sup>th</sup> and 75<sup>th</sup> percentiles)</b> | 4 (12 - 30)               | 10 (20 – 30)             | 0.013   | 6 (10 - 18)               | 12 (6 – 16)              | 0.32    | 0.47                    |
| <b>Blood biomarkers</b>                                                                          |                           |                          |         |                           |                          |         |                         |
| Triglycerides (mmol/L)                                                                           | 1.0 (0.7 – 1.9)           | 1.2 (0.9 – 1.6)          | 0.12    | 1.4 (1.0 – 1.9)           | 1.3 (1.0 – 1.9)          | 0.40    | 0.37                    |
| Cholesterol (mmol/L)                                                                             | 5.2 (0.9)                 | 5.7 (1.3)                | 0.016   | 5.5 (1.1)                 | 5.4 (1.1)                | 0.51    | 0.026                   |
| HDL (mmol/L)                                                                                     | 1.6 (0.4)                 | 1.5 (0.4)                | 0.60    | 1.2 (0.3)                 | 1.2 (0.3)                | 0.75    | 0.56                    |
| LDL (mmol/L)                                                                                     | 3.2 (0.9)                 | 3.7 (1.1)                | 0.004   | 3.6 (1.0)                 | 3.6 (1.0)                | 0.94    | 0.028                   |
| Glucose (mmol/L) <sup>t</sup>                                                                    | 5.3 (1.8)                 | 5.2 (0.9)                | 0.80    | 5.7 (1.5)                 | 5.5 (1.1)                | 0.38    | 0.78                    |
| HbA1c (%)                                                                                        | 5.7 (0.6)                 | 5.8 (0.4)                | 0.35    | 5.8 (0.7)                 | 5.8 (0.6)                | 0.86    | 0.51                    |
| <b>Pharmacotherapy % (n)</b>                                                                     |                           |                          |         |                           |                          |         |                         |
| Blood pressure lowering                                                                          | 36.1 (13)                 | 60.2 (59)                | 0.013   | 52.8 (19)                 | 58.9 (109)               | 0.50    | 0.18                    |
| Cholesterol lowering                                                                             | 8.5 (5)                   | 26.6 (37)                | 0.004   | 15.0 (9)                  | 23.3 (71)                | 0.16    | 0.08                    |
| Platelet inhibitors                                                                              | 3.4 (2)                   | 17.3 (24)                | 0.008   | 11.7 (7)                  | 14.8 (45)                | 0.53    | 0.20                    |
| <b>Self-reported symptoms at baseline or follow-up % (n)</b>                                     |                           |                          |         |                           |                          |         |                         |
| Dizziness                                                                                        | 51.7 (30)                 | 60.3 (82)                | 0.27    | 35.6 (21)                 | 48.3 (146)               | 0.07    | 0.68                    |
| Chest Pain                                                                                       | 32.8 (19)                 | 53.3 (73)                | 0.009   | 18.6 (11)                 | 54.8 (166)               | <0.001  | 0.09                    |
| Nausea                                                                                           | 43.1 (25)                 | 52.9 (72)                | 0.21    | 37.3 (22)                 | 34.1 (103)               | 0.64    | 0.22                    |
| Dyspnea                                                                                          | 24.1 (14)                 | 48.2 (65)                | 0.002   | 23.7 (14)                 | 40.2 (121)               | 0.017   | 0.53                    |
| Physically weak                                                                                  | 24.1 (13)                 | 28.3 (34)                | 0.56    | 25.5 (12)                 | 29.6 (84)                | 0.57    | 0.97                    |

BMI = body mass index, BPM = beats per minute, CVD = cardiovascular disease, HbA1c = Hemoglobin A1c, HDL = high density lipoprotein, LDL = low density lipoprotein, SD = standard deviation

**Table S3. Univariate and multiple logistic regression analysis for predictors of unrecognized myocardial infarction versus recognized myocardial infarction.**

|                                         | Univariate logistic regression |            |             | Multiple logistic regression |            |             |
|-----------------------------------------|--------------------------------|------------|-------------|------------------------------|------------|-------------|
|                                         | P-value                        | Odds ratio | 95% CI      | P-value                      | Odds ratio | 95% CI      |
| <b>Age group</b>                        |                                |            |             |                              |            |             |
| 18-39 years ( <i>reference</i> )        |                                |            |             |                              |            |             |
| 40-49 years                             | 0.05                           |            |             |                              |            |             |
| 50-59 years                             | 0.005                          | 0.27       | 0.11 – 0.68 | 0.028                        | 0.34       | 0.13 – 0.89 |
| 60-69 years                             | 0.006                          | 0.30       | 0.12 – 0.71 |                              |            |             |
| 70+ years                               | 0.009                          | 0.28       | 0.11 – 0.73 |                              |            |             |
| <b>Anthropometry</b>                    |                                |            |             |                              |            |             |
| BMI                                     | 0.61                           |            |             |                              |            |             |
| Heart rate                              | 0.49                           |            |             |                              |            |             |
| <b>Risk factor</b>                      |                                |            |             |                              |            |             |
| Hypertension                            | 0.12                           |            |             |                              |            |             |
| Hypercholesterolemia                    | 0.001                          | 0.46       | 0.29 – 0.73 |                              |            |             |
| Hypercholesterolemia * Sex <sup>#</sup> | 0.06                           |            |             |                              |            |             |
| Diabetes Mellitus                       | 0.72                           |            |             |                              |            |             |
| Active or former smoker                 | 0.74                           |            |             |                              |            |             |
| Family Health – CVD                     | 0.15                           |            |             |                              |            |             |
| <b>Blood biomarkers</b>                 |                                |            |             |                              |            |             |
| Triglycerides                           | 0.63                           |            |             |                              |            |             |
| Cholesterol                             | 0.32                           |            |             |                              |            |             |
| HDL                                     | 0.10                           |            |             |                              |            |             |
| LDL                                     | 0.044                          | 0.81       | 0.67 – 0.99 |                              |            |             |
| LDL * Sex <sup>#</sup>                  | 0.028                          | 0.62       | 0.40 – 0.95 |                              |            |             |
| Glucose                                 | 0.74                           |            |             |                              |            |             |
| HbA1c                                   | 0.35                           |            |             |                              |            |             |

BMI = body mass index, CI = confidence interval, CVD = cardiovascular disease, HbA1c = Hemoglobin A1c, HDL = high density lipoprotein, LDL = low density lipoprotein <sup>#</sup>Interaction term with sex. Values are given for women.

**Figure S1. Baseline (A) and follow-up (B) ECG of a Lifelines cohort participant who developed an unrecognized MI. Figure (A) shows a normal baseline ECG. Figure (B) shows a QS complex in V2-V3 indicative of a previous anterior myocardial infarction.**

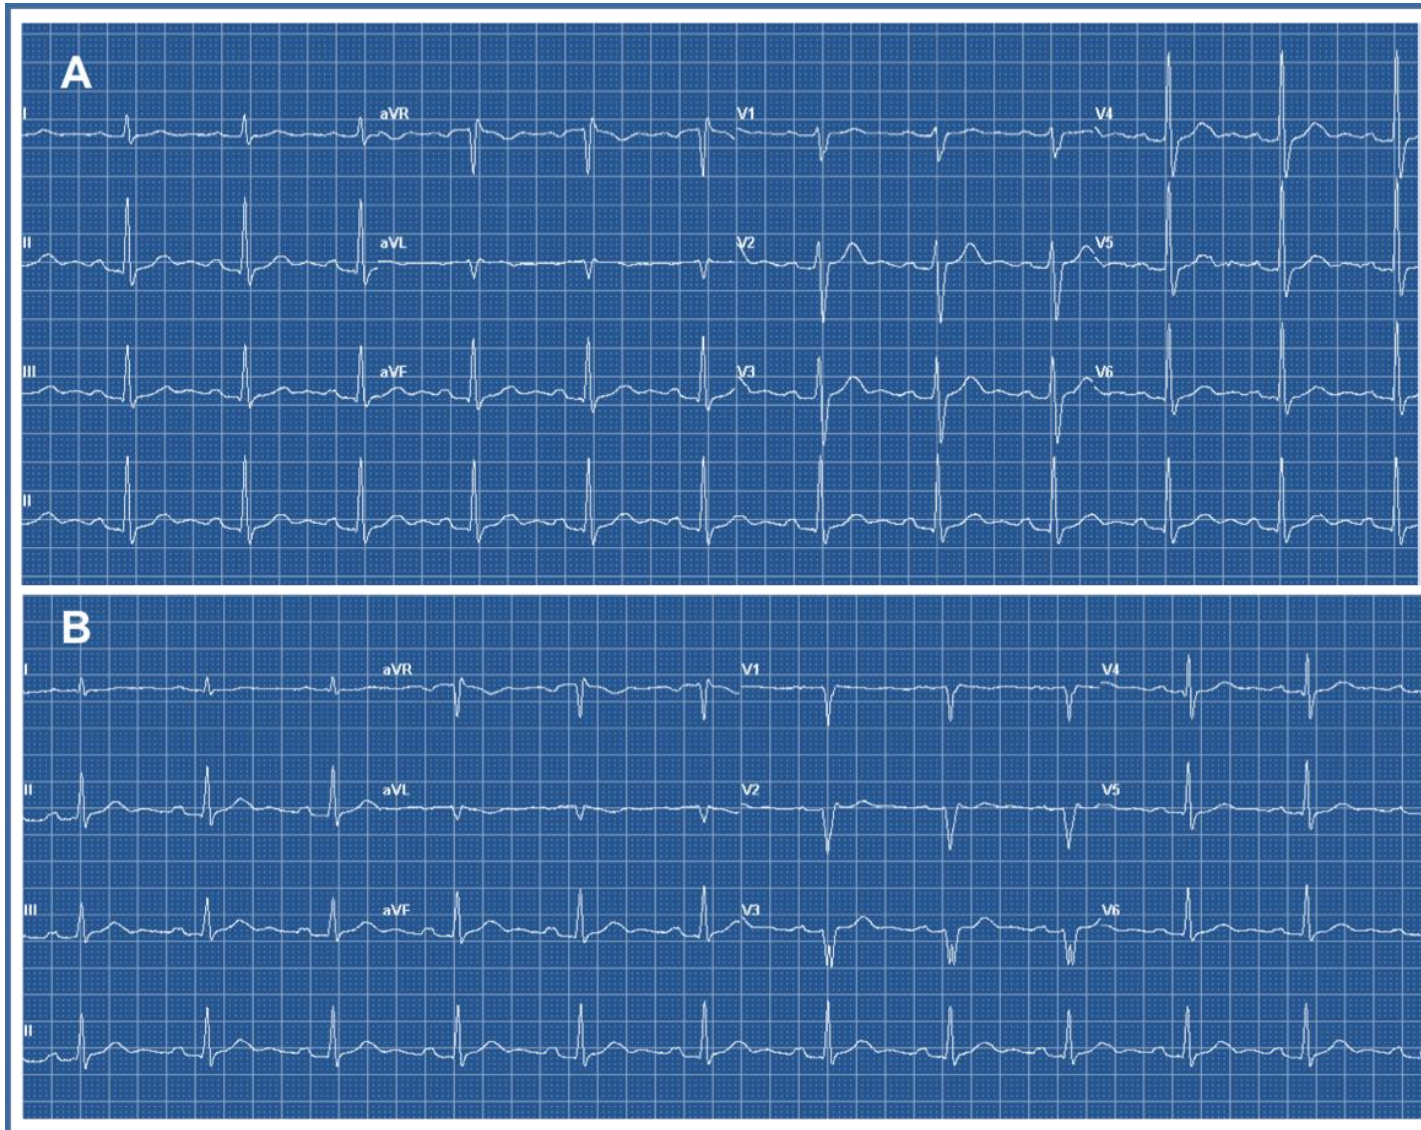

Figure S2. Age distribution of participants with recognized myocardial infarction (green) and unrecognized myocardial infarction (red). MI = myocardial infarction, UMI = unrecognized myocardial infarction.

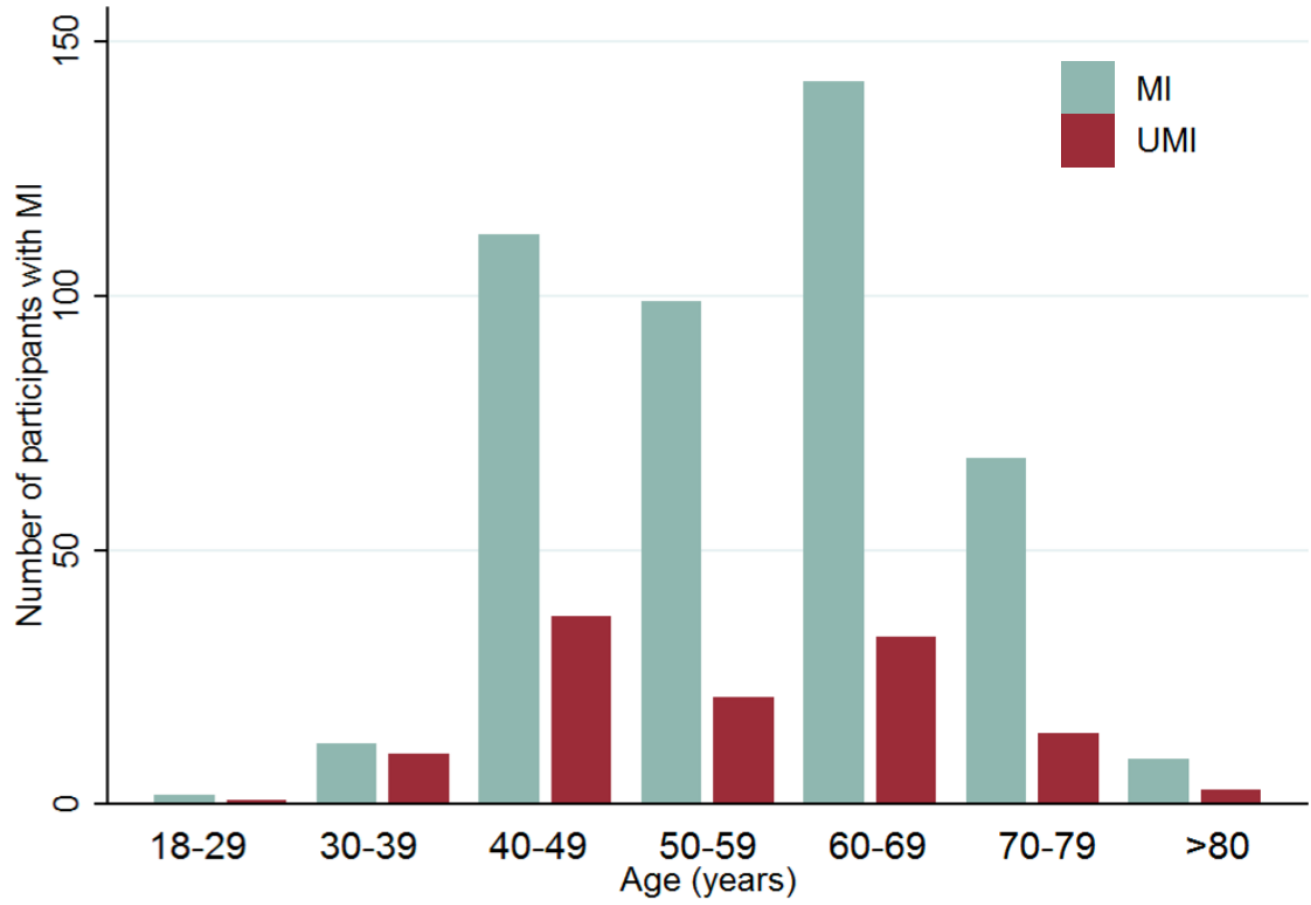

Supplement: JAH3-9-e015519-s001.pdf [file JAH3-9-e015519-s001.pdf]
